# Supplementary material for: Mobile app review analysis for crowdsourcing of software requirements: a mapping study of automated and semi-automated tools
Source: PeerJ Comput Sci. 2024 Nov 5;10:e2401. doi: 10.7717/peerj-cs.2401 (PMC11623114; doi:10.7717/peerj-cs.2401)
Supplement: Supplemental Information 2 [file peerj-cs-10-2401-s002.xlsx]

## Sheet: Sheet1
Study ID	Authors	Title
Study 1	Guzman and Maleej 2014	How Do Users Like This Feature? A Fine-Grained Sentiment Analysis of App Reviews
Study 2	Gu and Kim 2015	“What parts of your apps are loved by users?” (T)
Study 3	Vu et al., 2016	Phrase-Based Extraction of User Opinions in Mobile App Reviews
Study 4	Panichella et al., 2015	How Can I Improve My App? Classifying User Reviews for Software Maintenance and Evolution
Study 5	Maalej and Nabil 2015	Bug Report, Feature Request, or Simply Praise? On Automatically Classifying App Reviews
Study 6	Keertipati et al., 2016	Approaches for Prioritizing Feature Improvements Extracted from App Reviews
Study 7	Lu et al., 2017	Automatic Classification of Non-Functional Requirements from Augmented App User Reviews
Study 8	Kurtanovi ́ and Maalej 2017	Automatically Classifying Functional and Non-Functional Requirements Using Supervised Machine Learning
Study 9	Scalabrino et al., 2017	Listening to the Crowd for the Release Planning of Mobile Apps
Study 10	Noei et al., 2019	Too Many User-Reviews, What Should App Developers Look at First?
Study 11	Assi et al., 2021	FeatCompare: Feature comparison for competing mobile apps leveraging user reviews
Study 12	Phong et al., 2015	Mining User Opinions in Mobile App Reviews: A Keyword-based Approach
Study 13	Liu et al., 2021	Supporting features updating of apps by analyzing similar products in App stores
Study 14	Xu et al., 2018	Identifying Functional Aspects From User Reviews for Functionality-Based Mobile App Recommendation
Study 15	Wu et al., 2021	Identifying Key Features from App User Reviews
Study 16	Tao et al., 2020	Identifying security issues for mobile applications based on user review summarization
Study 17	Johann et al., 2017	SAFE: A Simple Approach for Feature Extraction from App Descriptions and App Reviews
Study 18	Wang et al., 2022a	Where is Your App Frustrating Users?
Study 19	Ciurumelea et al., 2017	Analyzing Reviews and Code of Mobile Apps for Better Release Planning
Study 20	Di Sorbo et al., 2017	SURF: Summarizer of User Reviews Feedback
Study 21	Malick et al., 2018	Comparing mobile apps by identifying ‘Hot’ features
Study 22	Triantafyllou et al., 2020	How to Utilize my App Reviews? A Novel Topics Extraction Machine Learning Schema for Strategic Business Purposes
Study 23	Motger et al., 2024	T-FREX: A Transformer-based Feature Extraction Method from Mobile App Reviews
Study 24	Palomba et al., 2018	Crowdsourcing User Reviews to Support the Evolution of Mobile Apps
Study 25	Jha et al., 2019	Mining non-functional requirements from App store reviews
Study 26	de Lima et al., 2022	Temporal dynamics of requirements engineering from mobile app reviews
Study 27	Panichella et al., 2016	ARdoc: App Reviews Development Oriented Classifier
Study 28	Sutino and Siahaan 2019	Feature extraction from app reviews in google play store by considering infrequent feature and app description
Study 29	Zhang et al., 2022	Mining User Privacy Concern Topics from App Reviews
Study 30	Martens and Johann 2017	On the Emotion of Users in App Reviews
Study 31	Jiang et al., 2019	Recommending New Features from Mobile App Descriptions
Study 32	Haoues et al., 2023	Machine learning for mHealth apps quality evaluation An approach based on user feedback analysis
Study 33	Wang et al., 2021	A feature-oriented analysis of developers’ descriptions and user reviews of top mHealth applications for diabetes and hypertension
Study 34	Haggag et al., 2022	A large-scale analysis of mHealth app user reviews
Study 35	Al Kilani et al., 2019	Automatic Classification of Apps Reviews for Requirement Engineering: Exploring the Customers Need from Healthcare Applications
Study 36	Gomez et al., 2015a	When App Stores Listen to the Crowd to Fight Bugs in the Wild
Study 37	Chen et al., 2014	AR-Miner: Mining informative reviews for developers from mobile app marketplace marketplace
Study 38	Nadeem et al., 2021	Extracting Software Change Requests from Mobile App Reviews
Study 39	Shah et al., 2018	Simple App Review Classification with Only Lexical Features
Study 40	Palomba et al., 2015	User Reviews Matter! Tracking Crowdsourced Reviews to Support Evolution of Successful Apps
Study 41	Chaa et al., 2021	Leveraging app features to improve mobile app retrieval
Study 42	Raharjana et al., 2021	Enhancing Software Feature Extraction Results Using Sentiment Analysis to Aid Requirements Reuse
Study 43	Saudy et al., 2021	A Proposed Keyword-Based Feature Extraction Approach for Labeling and Classifying Egyptian Mobile Apps Arabic Slang User requirements Reviews
Study 44	Shah et al., 2019a	Is the SAFE Approach Too Simple for App Feature Extraction? A Replication Study
Study 45	Ossai et al., 2023	Automatic user sentiments extraction from diabetes mobile apps – An evaluation of reviews with machine learning
Study 46	Bonny et al., 2022	Sentiment Analysis of User-Generated Reviews of Women Safety Mobile Applications
Study 47	Yahya et al., 2023	A Novel Hybrid Deep Learning Model for Detecting and Classifying Non-Functional Requirements of Mobile Apps Issues
Study 48	Huda et al., 2021	Feature Extraction Amazon Customer Review to Determine Topic on Smartphone Domain
Study 49	Malgaonkar et al., 2022	Prioritizing user concerns in app reviews – A study of requests for new features, enhancements and bug fixes
Study 50	Zhou et al., 2022	Emerging topic identification from app reviews via adaptive online biterm topic modeling
Study 51	Aslam et al., 2020	Convolutional neural network-based classification of app reviews
Study 52	Nayebi et al., 2018	App store mining is not enough for app improvement
Study 53	Al Kilani et al., 2019	Automatic Classification of Apps Reviews for Requirement Engineering: Exploring the Customers Need from Healthcare Applications
Study 54	Di Sorbo et al., 2021	Investigating the criticality of user-reported issues through their relations with app rating
Study 55	Gao et al., 2018	Online App Review Analysis for Identifying Emerging Issues
Study 56	Kaur et al., 2023	BERT-RCNN: an Automatic Classification of App Reviews using Transfer Learning based RCNN Deep Model
Study 57	Bakiu and Guzman 2017	Which Feature is Unusable? Detecting Usability and User Experience Issues from User Reviews
Study 58	Putri et al., 2016	Software Feature Extraction using Infrequent Feature Extraction
Study 59	Puspaningrum, et al., 2018	Mobile App Review Labeling Using LDA Similarity and Term Frequency-Inverse Cluster Frequency (TF-ICF)
Study 60	Villarroel et al., 2016	Release Planning of Mobile Apps Based on User Reviews algorithm
Study 61	Bakar et al., 2016	Extracting features from online software reviews to aid requirements reuse
Study 62	Grano et al., 2017	Android apps and user feedback: a dataset for software evolution and quality improvement
Study 63	Di Sorbo et al., 2016	What would users change in my app? Summarizing app reviews for recommending software changes
Study 64	Khalid et al., 2015	What do mobile app users complain about?
Study 65	Noei et al., 2019	Towards prioritizing user-related issue reports of mobile applications
Study 66	Palomba et al., 2017	Recommending and Localizing Change Requests for Mobile Apps based on User Reviews
Study 67	Song et al., 2020	Automatically Identifying Requirements-oriented Reviews Using A Top-Down Feature Extraction Approach
Study 68	Jha et al., 2017	Mining User Requirements from Application Store Reviews Using Frame Semantics
Study 69	Messaoud et al., 2019	A Multi-label Active Learning Approach for Mobile App User Review Classification
Study 70	Hu et al., 2019	Studying the Consistency of Star Ratings and Reviews of Popular Free Hybrid Android and iOS Apps
Study 71	Rizk et al., 2015	Investigating Mobile Applications' Requirements Evolution through Sentiment Analysis of Users' Reviews
Study 72	Prasetyo et al., 2017	Aspect Extraction using Informative Data from Mobile App Data Review
Study 73	Deewattananon and Sammapun 2017	Analyzing User Reviews in Thai Language toward Aspects in Mobile Applications
Study 74	Gomez et al., 2015b	A Recommender System of Buggy App Checkers for App Store Moderators
Study 75	Li et al., 2017	Mining User Reviews for Mobile App Comparisons
Study 76	Yang and Liuang 2015	Identification and Classification of Requirements from App User Reviews
Study 77	Luiz et al., 2018	A Feature-Oriented Sentiment Rating for Mobile App Reviews
Study 78	Suprayogi et al., 2018	Information Extraction for Mobile Application User Review
Study 79	Martin et al., 2016b	Causal impact analysis for app releases in Google Play
Study 80	Panichella 2018	Summarization techniques for code, change, testing, and user feedback
Study 81	Gao et al., 2023	Emerging app issue identification via online joint sentiment-topic tracing
Study 82	Gao et al., 2019	Emerging app issue identification from user feedback: Experience on wechat
Study 83	Zhou et al., 2019	User review-based change file localization for mobile applications
Study 84	Wang et al., 2022b	UISMiner: Mining UI suggestions from user reviews
Study 85	Panichella and Ruiz 2020	Requirements-collector: automating requirements specification from elicitation sessions and user feedback.
Study 86	Wei et al., 2017	Oasis: prioritizing static analysis warnings for android apps based on app user reviews
Study 87	Guo et al., 2020	Caspar: Extracting and synthesizing user stories of problems from app reviews
Study 88	Gao et al., 2022	Listening to Users' Voice: Automatic Summarization of Helpful App Reviews
Study 89	Harman et al., 2016	Mobile app and app store analysis, testing and optimisation
Study 90	Dragoni et al., 2019a	An unsupervised aspect extraction strategy for monitoring real-time reviews stream
Study 91	Rustam et al., 2020	Classification of shopify app user reviews using novel multi text features
Study 92	Zhang et al., 2014	Sentiment analysis on reviews of mobile users
Study 93	Guzman et al., 2016	Retrieving Diverse Opinions from App Reviews
Study 94	Dalpiaz and Parente 2019	RE-SWOT: From User Feedback to Requirements via Competitor Analysis
Study 95	Iacob et al., 2016	MARAM: tool support for mobile app review management
Study 96	Xiao et al., 2020	Detecting user significant intention via sentiment-preference correlation analysis for continuous app improvement
Study 97	McIlroy et al., 2016	Analyzing and automatically labelling the types of user issues that are raised in mobile app reviews
Study 98	Gao et al., 2018	INFAR: insight extraction from app reviews
Study 99	Gao et al., 2015a	AR-Tracker: Track the Dynamics of Mobile Apps via User Review Mining
Study 100	Gao et al., 2015b	PAID: Prioritizing app issues for developers by tracking user reviews over versions
Study 101	Man et al., 2016	Experience Report: Understanding Cross-Platform App Issues From User Reviews
Study 102	Hadi and Fard., 2020	Aobtm: Adaptive online biterm topic modeling for version sensitive short-texts analysis.
Study 103	Tan et al., 2023	STRE: An Automated Approach to Suggesting App Developers When to Stop Reading Reviews
Study 104	Zahoor et al., 2023	Explainable artificial intelligence approach towards classifying educational android app reviews using deep learning
Study 105	Dąbrowski et al., 2022	Mining user feedback for software engineering: Use cases and reference architecture
Study 106	Licorish et al., 2017	Attributes that Predict which Features to Fix: Lessons for App Store Mining
Study 107	Stanik et al., 2019	Classifying Multilingual User Feedback using Traditional Machine Learning and Deep Learning
Study 108	Unterbusch et al., 2023	Explanation Needs in App Reviews: Taxonomy and Automated Detection
Study 109	de Araújo, and Marcacini 2021	Re-bert: automatic extraction of software requirements from app reviews using Bert language model
Study 110	Malgaonkar et al., 2022	Prioritizing user concerns in app reviews – a study of requests for new features, enhancements and bug fixes
Study 111	Shah et al., 2019b	Using app reviews for competitive analysis: tool support
Study 112	Deshpande et al., 2018	User Feedback from Tweets vs App Store Reviews: An Exploratory Study of Frequency, Timing and Content
Study 113	Zhang et al., 2017	CSLabel: An Approach for Labelling Mobile App Reviews
Study 114	Aldabbas et al., 2020	Google play content scraping and knowledge engineering using natural language processing techniques with the analysis of user reviews
Study 115	Umer et al., 2021	Predicting numeric ratings for Google apps using text features and ensemble learning
Study 116	Edara et al., 2020	Health app recommendation system using ensemble multimodel deep learning
Study 117	Dhinakaran et al., 2018	App review analysis via active learning: Reducing supervision effort without compromising classification accuracy
Study 118	Ali et al., 2017	Same app, different app stores: A comparative study
Study 119	Grano et al., 2018	Exploring the integration of user feedback in automated testing of android applications
Study 120	Gao et al., 2019	Automating app review response generation
Study 121	Saidani et al., 2022	Tracking bad updates in mobile apps: A search-based approach
Study 122	Gui et al., 2017	What Aspects of Mobile Ads Do Users Care About? An Empirical Study of Mobile In-app Ad Reviews
Study 123	Guzman et al., 2015	Ensemble methods for app review classification: an approach for software evolution
Study 124	Ruiz et al., 2015	Examining the rating system used in mobile-app stores
Study 125	Chen et al., 2021	How Should I Improve the UI of My App?: A Study of User Reviews of Popular Apps in the Google Play
Study 126	Deshpande et al., 2018	User feedback from tweets vs app store reviews: an exploratory study of frequency, timing and content
Study 127	Gunaratnam and Wickramarachchi 2020	Computational model for rating mobile applications based on feature extraction
Study 128	Zhang et al., 2019	Software feature refinement prioritization based on online user review mining
Study 129	Puspaningrum et al., 2018	Mobile app review labeling using lda similarity and term frequency-inverse cluster frequency (TF-ICF)
Study 130	Suprayogi et al., 2018	Information extraction for mobile application user review
Study 131	Li et al., 2018	Automatic user preferences elicitation: A data-driven approach
Study 132	Groen et al., 2017	Users—the hidden software product quality experts?: A study on how app users report quality aspects in online reviews
Study 133	Park et al., 2015	Leveraging user reviews to improve accuracy for mobile app retrieval
Study 134	Al-Subaihin et al., 2016	Clustering mobile apps based on mined textual features
Study 135	Sarro et al., 2015	Feature lifecycles as they spread, migrate, remain, and die in app stores.
Study 136	Sarro et al., 2018	Customer rating reactions can be predicted purely using app features
Study 137	Finkelstein et al., 2017	Investigating the relationship between price, rating, and popularity in the Blackberry World App Store
Study 138	Nayebi et al., 2018	App store mining is not enough for app improvement
Study 139	Liu et al., 2018	Mining android app descriptions for permission requirements recommendation
Study 140	Etaiwi et al., 2020	Order in chaos: prioritizing mobile app reviews using consensus algorithms
Study 141	Dąbrowski et al., 2020	Mining user opinions to support requirement engineering: an empirical study
Study 142	Gomaa et al., 2020	Using resampling techniques with heterogeneous stacking ensemble for mobile app stores reviews analytics
Study 143	Trupthi et al., 2016	Improved feature extraction and classification—Sentiment analysis
Study 144	Yao et al., 2022	Non-Functional Requirements Analysis Based on Application Reviews in the Android App Market
Study 145	Sutino et al., 2019	Feature extraction from app reviews in google play store by considering infrequent feature and app description
Study 146	Yang and Liang 2015	Identification and Classification of Requirements from App User Reviews
Study 147	Mekala et al., 2021	Classifying user requirements from online feedback in small dataset environments using deep learning
Study 148	Haering et al., 2021	Automatically matching bug reports with related app reviews
Study 149	Binder et al., 2023	Automatically Classifying Kano Model Factors in App Reviews
Study 150	Duan et al., 2021	RCBERT an approach with transfer learning for app reviews classification
Study 151	Martens et al., 2019	Towards understanding and detecting fake reviews in app stores
Study 152	Nayebi et al., 2016	Release Practices for Mobile Apps--What do Users and Developers Think?
Study 153	Licorish et al., 2017	Attributes that predict which features to fix: Lessons for app store mining
Study 154	Nasiri et al., 2019	Aspect Category Detection on Indonesian E-commerce Mobile Application Review
Study 155	Henao et al., 2021	Transfer learning for mining feature requests and bug reports from tweets and app store reviews
Study 155	Ren et al., 2021	A lexicon-enhanced attention network for aspect-level sentiment analysis
Study 157	Alturaief et al., 2021	Aware: Aspect-based sentiment analysis dataset of apps reviews for requirements elicitation
Study 158	Ballas et al., 2024	Automating Mobile App Review User Feedback with Aspect-Based Sentiment Analysis
Study 159	Yue and Li 2020	Sentiment analysis using Word2vec-CNN-BiLSTM classification
Study 160	Bhuvaneshwari et al., 2022	Sentiment analysis for user reviews using Bi-LSTM self-attention-based CNN model
Study 161	Gambo et al., 2024a	Identifying and Resolving Conflict in Mobile Application Features through Contradictory Feedback Analysis
Study 162	Gambo et al., 2024b	Enhancing User Trust and Interpretability in AI-Driven Feature Request Detection for Mobile App Reviews
Study 163	Nugroho et al., 2021	Bert fine-tuning for sentiment analysis on indonesian mobile apps reviews
Study 164	Ho et al., 2024	ChatReview: A ChatGPT-enabled natural language processing framework to study domain-specific user reviews
Study 165	Nasab et al., 2024	A Study of Fairness Concerns in AI-based Mobile App Reviews
Study 166	Lee et al., 2022	Feature Analysis for Detecting Mobile Application Review Generated by AI-Based Language Model
Study 167	Lee et al., 2024	Determining the best feature combination through text and probabilistic feature analysis for GPT-2-based mobile app review detection
Study 168	Shrestha et al, 2024	Generating Rate Features for Mobile Applications
Study 169	Roumeliotis et al., 2024	LLMs in e-commerce: a comparative analysis of GPT and LLaMA models in product review evaluation
Study 170	Raman et al., 2024	Analyzing Sentiments in Motorku X App Reviews using the Naive Bayes Classifier Approach
Study 171	Ali et al., 2024	Bert based severity prediction of bug reports for the maintenance of mobile applications
Study 172	Mondal et al., 2024	Analysing user reviews of interactive educational apps: a sentiment analysis approach. Interactive learning environments
Study 173	Nema et al., 2022	Analyzing user perspectives on mobile app privacy at scale
Study 174	Motger et al., 2024b	Leveraging Large Language Models for Mobile App Review Feature Extraction
Study 175	de Araújo and Marcacini 2021	Re-bert: automatic extraction of software requirements from app reviews using bert language model
Study 176	Yang et al., 2021	A BERT and topic model-based approach to reviews requirements analysis
Study 177	Ullah et al., 2023	Sentiment analysis of mobile apps using BERT
Study 178	Gallego et al., 2023	TransFeatEx: a NLP pipeline for feature extraction
Study 179	Motger et al., 2024	Unveiling competition dynamics in mobile app markets through user reviews
Study 180	Ebrahimi et al., 2021	Classifying mobile applications using word embeddings
